# Supplementary material for: Relative Contributions of Various Cellular Mechanisms to Loss of Algae during Cnidarian Bleaching
Source: PubMed Central journal article supplement (PMC4847765; doi:10.1371/journal.pone.0152693), 2016-04-27
Supplement: pone.0152693.s001.pdf [file pone.0152693.s001.pdf]

Versus Human Caspase 3: 32% Identity over 247 amino acids

```

25497 235 YPSNKRPRGICLIFNNTFNQDRSLHLPRRDGTEKDVENLKLLEWKLHFVIVKPDTAHEMYDTARDYSRLDHSNYDCFVCCILSHGVQ 324
Casp3 37 YKMDYPEMGLCIIINNKNFHKSTGMTS--RSGTVDVAANLRETFRNLKYEVNRKNDLTREEIVELMRDVSKEDHSKRSSFVCVLLSHGEE 124
* : * : * : * : * : * : * : * : * : * : * : * : * : * : * : * : * : * : * : * : * : * : * : * : * : * : * : * :
25497 325 GGIYGSDGEIIELGQITSQFKGTACXSLANKPKLFFVQACRGTDFDPGVQADAVXNSDEEAMRHSAEPNEGHLLGYATPPGYVSWRSTQ 414
Casp3 125 GIIFGTNG-PVDLKKITNFFRGDRCSRSLTGKPKLFFIQACRGTELDCGIETDSG---VDDDMACHKIPVEADFLYAYSTAPGYSWRNSK 210
* * : * : * : * : * : * : * : * : * : * : * : * : * : * : * : * : * : * : * : * : * : * : * : * : * : * : * :
25497 415 HGSWYISHLCDVFHTYCERFDIMSMVMVNGKVSEAYTKKGYKQCPAPVSPVNCLDSQEEETKSLYK 481
Casp3 211 DGSWFIQSLCAMLKQYADKLEFMHILTRVNRKVATEFESFSFDATFHAKKQIPCVSMLTKELYFYH 277
. * * : * : * : * : * : * : * : * : * : * : * : * : * : * : * : * : * : * : * : * : * : * : * : * : * : * : * :
    
```

Versus Human Caspase 7: 33% Identity over 249 amino acids

```

25497 235 YPSNKRPRGICLIFNNTFNQDRSLHLPRRDGTEKDVENLKLLEWKLHFVIVKPDTAHEMYDTARDYSRLDHSNYDCFVCCILSHGVQ 324
Casp7 60 YNMFEKLGKCIINNKNFDKVTGMGV--RNGTDKDAEALFKCFRSLGFDVIVYNDCCAKMQDLLKASEEDHTNAACFACILLSHGEE 147
* * . * * : * : * : * : * : * : * : * : * : * : * : * : * : * : * : * : * : * : * : * : * : * : * : * : * :
25497 325 GGIYGSDGEIIELGQITSQFKGTACXSLANKPKLFFVQACRGTDFDPGVQADAVXNSDEEAMRHSAEPNEGHLLGYATPPGYVSWRSTQ 414
Casp7 148 NVIYKGDG-VTPIKDLTAHFRGDRCKTLLEKPKLFFIQACRGTELDDGIQADSGPINDTANPRYKIPVEADFLYAYSTVPGYSWRSPG 236
. * * : * : * : * : * : * : * : * : * : * : * : * : * : * : * : * : * : * : * : * : * : * : * : * : * : * : * :
25497 415 HGSWYISHLCDVFHTYCERFDIMSMVMVNGKVSEAYTKKGYKQCPAPVSPVNCLDSQEEETKSLYKDP 483
Casp7 237 RGSWFVQALCSILEEHGKLEIMQILTRVNRVARHFESQSDDPHFHEKKQIPCVVS--MLTKELYFSQ 303
: * * : * : * : * : * : * : * : * : * : * : * : * : * : * : * : * : * : * : * : * : * : * : * : * : * : * : * :
    
```

Versus Human Caspase 9: 37% Identity over 249 amino acids

```

25497 235 YPSNKRPRGICLIFNNTFNQDRSLHLPRRDGTEKDVENLKLLEWKLHFVIVKPDTAHEMYDTARDYSRLDHSNYDCFVCCILSHGVQ 324
Casp9 153 YILSMEPCGHCLINNKNFCRESGLRT--RTGSNIDCEKLRRRFSSPHMVEVKGDLTAKKMVLALELAQQDHGALDCCVVVILSHGCQ 240
* . * * * : * : * : * : * : * : * : * : * : * : * : * : * : * : * : * : * : * : * : * : * : * : * : * : * :
25497 325 G-----GIYGSDGEIIELGQITSQFKGTACXSLANKPKLFFVQACRGTDFDPGVQADAVXNSDEEAMRHSAEPNEGHLLGYAT---- 403
Casp9 241 ASHLQFPGAVYGTDCGPVSVEKIVNIFNGTSCPSLGGKPKLFFIQACGGEQKDHGFEVAST-SPEDESPGSNPEDATPFQEGLRTFDQL 329
. . : * : * : * : * : * : * : * : * : * : * : * : * : * : * : * : * : * : * : * : * : * : * : * : * : * : * : * :
25497 404 -----P-----PGYVSWRSTQHGSWYISHLCDVFHTYCERFDIMSMVMVNGKVSEAYTKKGYKQCPAPVSPVNCLDSQEEETK 475
Casp9 330 DAISSLPTPSDIFVSYSTFPGFVSWRDPKSGSWVETLDDIFEQWAHSEDLSLLRVANAVS---VKGIYKOMPG-----CFNFLR-- 408
* * * : * : * : * : * : * : * : * : * : * : * : * : * : * : * : * : * : * : * : * : * : * : * : * : * : * : * : * :
25497 476 TKSLYKDP 483
Casp9 409 KKLFFKTS 416
.* : * : * :
    
```
