# Supplementary material for: Relative Contributions of Various Cellular Mechanisms to Loss of Algae during Cnidarian Bleaching
Source: PubMed Central journal article supplement (PMC4847765; doi:10.1371/journal.pone.0152693), 2016-04-27
Supplement: pone.0152693.s003.pdf [file pone.0152693.s003.pdf]

27°C, 25  $\mu\text{mol photons m}^{-2} \text{s}^{-1}$

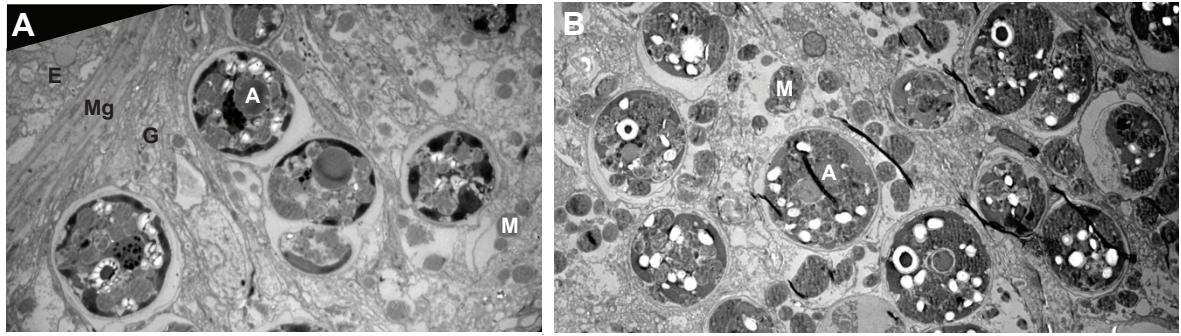

34°C, 150  $\mu\text{mol photons m}^{-2} \text{s}^{-1}$

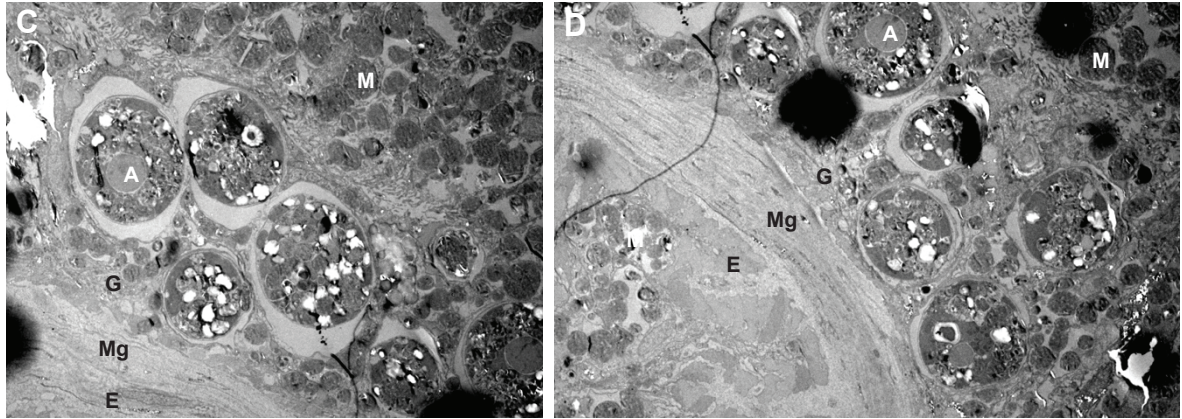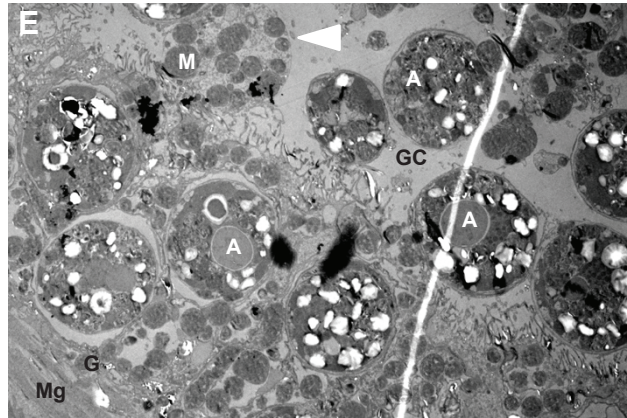

10  $\mu\text{m}$
