# Supplementary material for: Relative Contributions of Various Cellular Mechanisms to Loss of Algae during Cnidarian Bleaching
Source: PubMed Central journal article supplement (PMC4847765; doi:10.1371/journal.pone.0152693), 2016-04-27

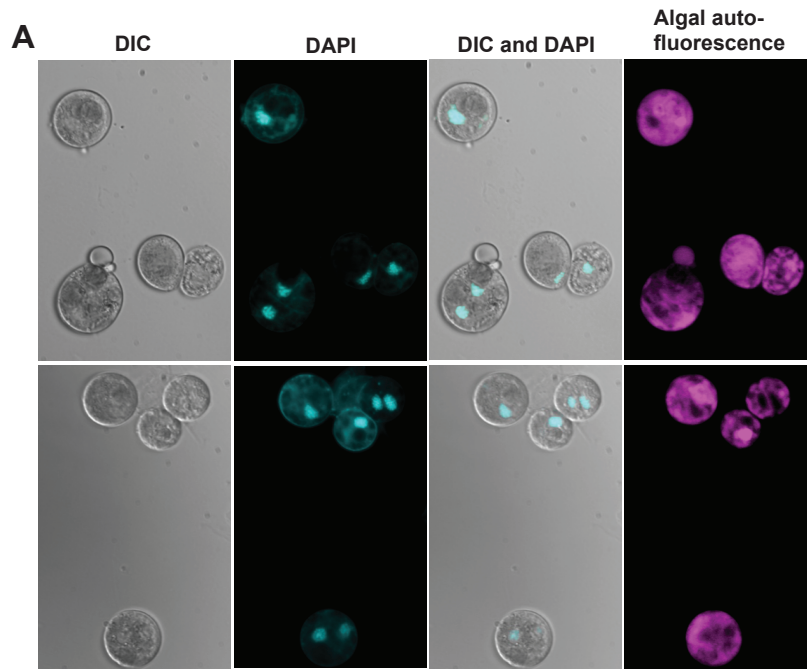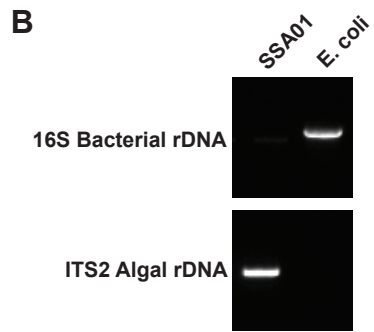

Supplement: pone.0152693.s004.pdf [file pone.0152693.s004.pdf]
